# Supplementary material for: The neural basis for a persistent internal state in Drosophila females
Source: eLife. 2020 Nov 23;9:e59502. doi: 10.7554/eLife.59502 (PMC7787663; doi:10.7554/eLife.59502)
Supplement: Supplementary file 1. — This Table contains FlyWire segment IDs for each cell, cell names where identified, and links to the cells in FlyWire. [file elife-59502-supp1.xlsx]

## Sheet: FlyWire_pC1
pC1 subtype	Hemisphere (posterion view)	FlyWire segment ID (version used in Deutsch et al. 2020)	FlyWire soma coordinates	Flywire Neuron Database ID
pC1a	Left	720575940617307953	146687, 43948, 5037	000183
pC1b	Left	720575940633531503	146810, 43872, 4803	000177
pC1c	Left	720575940633769335	145823, 42810, 5061	000182
pC1d	Left	720575940618771952	145817, 41367, 5139	000179
pC1e	Left	720575940620639256	142741, 44980, 4908	000175
pC1a	Right	720575940629334841	120614, 48631, 5378	000801
pC1b	Right	720575940612211198	119733, 45797, 4998	000150
pC1c	Right	720575940614245947	119102, 46543, 5218	000151
pc1d	Right	720575940623313866	125483, 45655, 5019	000162
pC1e	Right	720575940624753466	123240, 51333, 5237	000802

## Sheet: FlyWire_aIPg (one hemisphere)
aIPg subtype	Hemisphere (posterion view)	FlyWire segment ID (version used in Deutsch et al. 2020)	FlyWire soma coordinates	Flywire Neuron Database ID
aIPg-a	Left	720575940626345577	159548, 54417, 5069	000842
aIPg-a	Left	720575940613518092	160611, 54157, 4886	000841
aIPg-a	Left	720575940620077526	156581, 53090, 5349	001355
aIPg-a	Left	720575940629779015	158089, 53152, 5109	001327
aIPg-a	Left	720575940626953063	157268, 53603, 5041	000839
aIPg-a	Left	720575940612912287	158824, 54125, 4943	001337
aIPg-b	Left	720575940636747854	158657, 53425, 5382	001368
aIPg-b	Left	720575940609970090	160936, 53400, 5298	001363
aIPg-b	Left	720575940626321707	160292, 55201, 5343	001373
aIPg-b	Left	720575940637165987	157218, 54117, 5232	001367
aIPg-b	Left	720575940632598111	162283, 55405, 5144	001345
aIPg-b	Left	720575940609533845	159277, 54898, 5198	001321
aIPg-b	Left	720575940617904475	158057, 54545, 5247	001344
aIPg-b	Left	720575940629196856	156012, 54720, 5341	001361
aIPg-b	Left	720575940615200441	157985, 53850, 5335	001357
aIPg-b	Left	720575940617591687	157252, 53948, 5416	001356
aIPg-b	Left	720575940649858038	159737, 54605, 5393	001374
aIPg-b	Left	720575940609915365	159246, 54154, 5341	001364
aIPg-b	Left	720575940620431752	159097, 53173, 5311	001360
aIPg-b	Left	720575940628671173	160318, 53935, 5346	001323
aIPg-b	Left	720575940619540506	162897, 54366, 5270	001322
aIPg-b	Left	720575940618376614	159637, 52799, 5277	001324
aIPg-b	Left	720575940618177371	156552, 55390, 5425	001338
aIPg-b	Left	720575940610867683	158112, 54642, 5354	001325
aIPg-b	Left	720575940652417697	157025, 56138, 5329	000846
aIPg-b	Left	720575940626519811	162456, 55582, 5356	001372
aIPg-b	Left	720575940623675578	155899, 55955, 5432	000853
aIPg-b	Left	720575940623772734	155949, 54480, 5439	000840
aIPg-b	Left	720575940619865676	156945, 57772, 5326	001352
aIPg-b	Left	720575940610560022	159306, 55303, 5299	001366
aIPg-c	Left	720575940623766458	162721, 53572, 4910	001377
aIPg-c	Left	720575940624211075	159806, 54339, 4935	001320
aIPg-c	Left	720575940628698898	160818, 54058, 5005	001362
aIPg-c	Left	720575940635648602	159565, 54293, 5261	000844
aIPg-c	Left	720575940629957201	160738, 54941, 5099	001319
aIPg-c	Left	720575940617900123	161630, 55720, 5275	001333
aIPg-c	Left	720575940628135675	160482, 56856, 5290	000845
aIPg-c	Left	720575940633353327	155440, 55373, 5393	000843

## Sheet: pC1d_In_byType
FlyWire segment ID (version used in Deutsch et al. 2020)	Soma coordinates (I/C - Ipsi/Contralateral to pC1d)	Flywire Neuron Database ID	hemibrain 1.1 type with shared morphology	Total presynaptic to pC1d (synapses)	presynaptic to pC1d	postsynaptic to pC1d	Deutsch et al. 2020
720575940636741685	167537, 75083, 2209 (I)	002511	AVLP096	264	43	0	pC1d_In1
720575940612153746	97222, 63357, 1574 (C)	000833	AVLP096		39	0	pC1d_In1
720575940623368906	101224, 61390, 1757 (C)	001380	AVLP096		39	0	pC1d_In1
720575940637168035	102129, 63455, 2037 (C)	000837	AVLP096		35	0	pC1d_In1
720575940629335097	99768, 62543, 1657 (C)	000820	AVLP096		33	0	pC1d_In1
720575940629657192	167535, 75040, 1981 (I)	001379	AVLP096		31	0	pC1d_In1
720575940630436141	100032, 61529, 1686 (C)	000831	AVLP096		27	0	pC1d_In1
720575940614239547	166354, 75405, 2081 (I)	000953	AVLP096		17	0	pC1d_In1
720575940620266957	156832, 80611, 2274 (I)	000827	AOTU064	149	137	26	pC1d_In2
720575940638698997	109586, 75377, 2022 (C)	002904	AOTU064		12	0	pC1d_In2
720575940621618429	99793, 46317, 5311 (C)	001404	CL278 (pIP5 candidate)	130	47	0	pC1d_In3, pC2-like/pIP5
720575940611528243	99929, 48351, 5386 (C)	000809	CL278 (pIP5 candidate)		45	0	pC1d_In3, pC2-like/pIP5
720575940618286831	105199, 50012, 5652 (I)	000810	CL278 (pIP5 candidate)		31	0	pC1d_In3, pC2-like/pIP5
720575940617661831	161392, 51922, 4785 (C)	001822	CL278 (pIP5 candidate)		7	0	pC1d_In3, pC2-like/pIP5
720575940614669707	164275, 76207, 2063 (I)	002510	WED014	97	50	0	pC1d_In4
720575940630492845	165392, 77496, 2303 (I)	000822	WED014		24	0	pC1d_In4
720575940615137681	98252, 59781, 1572 (C)	001387	WED014		23	0	pC1d_In4
720575940633769335	145922, 42794, 5034 (I)	000182	pC1c	97	38	13	pC1d_In5
720575940629334841	120614, 48631, 5378 (C)	000801	pC1a		21	0	pC1d_In5 (pC1e_In7 )
720575940620639256	142741, 44980, 4908 (I)	000175	pC1e		16	11	pC1d_In5
720575940623313866	125483, 45655, 5019 (C)	000162	pC1d		16	20	pC1d_In5
720575940624753466	123240, 51333, 5237 (C)	000802	pC1e		6	0	pC1d_In5
720575940623772734	155931, 54512, 5449 (I)	000840	aIPg1-3	88	45	68	pC1d_In6 (also pC1d_Out3, pC1e_In4, pC1e_Out3), aIP-g-b
720575940652417697	156992, 56149, 5331 (I)	000846	aIPg1-3		29	48	pC1d_In6 (also pC1d_Out3, pC1e_In4, pC1e_Out3), aIP-g-b
720575940623675578	155888, 55974, 5428 (I)	000853	aIPg1-3		14	21	pC1d_In6 (also pC1d_Out3, pC1e_Out3), aIP-g-b
720575940631263457	92315, 41503, 2410 (C)	002509	AOTU008_a/AOTU008_b	85	21	0	pC1d_In7
720575940622365991	166931, 46669, 1059 (I)	002899	AOTU008_a/AOTU008_b		19	0	pC1d_In7
720575940641738440	169919, 45419, 1306 (I)	001424	AOTU008_a/AOTU008_b		12	0	pC1d_In7
720575940630692141	93637, 42176, 2232 (C)	002906	AOTU008_a/AOTU008_b		10	0	pC1d_In7
720575940641653408	169391, 44988, 1204 (I)	002909	AOTU008_a/AOTU008_b		9	0	pC1d_In7
720575940620668696	97355, 40192, 2091 (C)	002910	AOTU008_a/AOTU008_b		8	0	pC1d_In7
720575940617369649	167586, 45904, 1124 (I)	002922	AOTU008_a/AOTU008_b		6	0	pC1d_In7
720575940626331435	101214, 48907, 5254 (C)	001390	PVLP130	85	85	0	pC1d_In8 (pC1e_In20)
720575940624030236	181152, 43219, 3433 (I)	001395	AVLP029	80	80	0	pC1d_In9
720575940602076896	169652, 62282, 988 (I)	001434		79	27	0	(pC1e_In1)
720575940628126039	173599, 62572, 1226 (I)	002783			18	0	(pC1e_In1)
720575940611629521	171828, 62439, 1066 (I)	001389			16	0
720575940617297713	173430, 60206, 1195 (I)	000823			18	0	(pC1e_In1)
720575940615168985	159392, 54342, 1086 (I)	002101		69	23	0
720575940613480134	159506, 53115, 1281 (I)	000824			21	15	(pC1d_Out6)
720575940609742259	162752, 54763, 936 (I)	001391			16	0
720575940631109858	158672, 54000, 1178 (I)	001510			9	34	(pC1d_Out6)
720575940613617339	159463, 38056, 1009 (I)	001394		65	35	0
720575940602652844	105074, 28846, 2087 (C)	000814			30	0	(pC1e_Out13)
720575940620652301	164074, 77136, 1700 (I)	002506		64	32	0
720575940632373402	166876, 75791, 1811 (I)	001428			23	0
720575940617313841	166274, 79268, 2206 (I)	002911			9	0
720575940629184810	129717, 91627, 3478 (Middle)	000067		63	56	0
720575940622007560	129191, 87329, 2469 (Middle)	002933			7	0
720575940623531301	Soma Ouside of data set	000816		55	55	0	(pC1e_In11)
720575940615124436	171059, 75262, 2521 (I)	000950	vpoEN	55	30	0
720575940608784850	159548, 73132, 4342 (I)	000281	vpoEN		18	0
720575940622326567	91280, 73006, 3316 (C)	002615	vpoEN		7	0
720575940624219011	166142, 76009, 2265 (I)	001378		54	54	0
720575940614817117	122491, 23526, 3496 (C)	000819		51	22	0
720575940627686455	144788, 26486, 3591 (I)	002512			19	0
720575940626024433	119852, 22095, 3598 (C)	002919			10	0
720575940620088534	176991, 30584, 3510 (I)	001422		49	49	0
720575940628289111	148617, 46345, 4588 (I)	001406		47	33	0
720575940635743551	118393, 46149, 4742 (C)	002903			14	0
720575940622510606	80766, 46617, 3203 (C)	000817		45	24	0
720575940630728659	82667, 47037, 3095 (C)	000813			15	0
720575940629954335	177148, 53976, 1612 (I)	002918			6	7
720575940612363414	152175, 45854, 4825 (I)	000828	vpoDN	44	44	0	pMN2 (vpoDN)
720575940604426697	148464, 40431, 5236 (I)	001407		43	25	0
720575940619980509	147897, 42764, 5082 (I)	001420			18	0
720575940624226691	117075, 48844, 5242 (C)	001437		41	41	0
720575940625103698	129683, 29669, 1155 (Middle)	001157		41	19	0
720575940618919856	129978, 33476, 914 (Middle)	002912			10	0
720575940627351418	126639, 31996, 1007 (Middle)	002921			12	0
720575940621860104	159957, 73232, 4249 (I)	002508		39	24	0
720575940620585096	160167, 68215, 4968 (I)	002902			15	0
720575940636757326	176762, 31709, 4041 (I)	001425		38	20	0
720575940636740917	175328, 32487, 4129 (I)	000952			18	0
720575940636596021	165331, 76091, 2143 (I)	000815		38	38	0
720575940619644254	141144, 23678, 3380 (I)	000826		37	21	0
720575940624672905	121710, 21611, 3501 (C)	001410			16	0
720575940621397245	136331, 89535, 2489 (Middle)	001398		32	26	0
720575940621705213	(129241, 41567, 1415; No Soma detected)	002934			6	0
720575940617364939	164674, 76130, 2490 (I)	001415		26	26	0
720575940621159914	142475, 24721, 3311 (I)	002901		26	15	0
720575940638701301	119265, 23097, 3604 (C)	002905			11	0
720575940629935012	144074, 74137, 1198 (I)	001409		25	16	0
720575940626015473	147991, 73653, 1158 (I)	002907			9	0
720575940615071581	166556, 78390, 1893 (I)	002931		23	23	0
720575940629956655	160185, 73052, 1182 (I)	001433		22	22	0	(pC1e_In16)
720575940622516557	181562, 36628, 2860 (I)	000949		21	21	0	(pC1e_In5)
720575940633353327	155455, 55364, 5395 (I)	000843	aIPg4 (5813068484)/SMP558	21	15	65	(pC1d_Out2, pC1e_Out5), aIP-g-c
720575940628135675	160399, 56856, 5289 (I)	000845	aIPg4 (5813068484)/SMP558		6	115	(pC1d_Out2, pC1e_Out5), aIP-g-c
720575940629026858	167567, 79073, 2308 (I)	001397		20	20	0
720575940631331553	104989, 79971, 2301 (I)	002774		20	20	0
720575940608571256	130675, 35782, 880 (Middle)	001431		20	20	0	(pC1e_In8)
720575940638626293	(124862, 99474, 6622; Soma outside data set)	002900		20	20	0
720575940621462279	161300, 53236, 4937 (I)	001927		19	19	0
720575940629793863	183299, 46317, 2844 (I)	001414		19	19	0

## Sheet: pC1d_Out_byType
FlyWire segment ID (version used in Deutsch et al. 2020)	Soma coordinates (I/C - Ipsi/Contralateral to pC1d)	Flywire Neuron Database ID	hemibrain 1.1 type with shared morphology	Total postsynaptic to pC1d (synapses)	postsynaptic to pC1d	presynaptic to pC1-d	Deutsch et al. 2020
720575940626953063	157268, 53603, 5041(I)	000839	SMP555/SMP556	588	192	0	pC1d_Out1 (pC1e_Out2), aIP-g-a
720575940626345577	159548, 54417, 5069 (I)	000842	SMP555/SMP556		192	0	pC1d_Out1 (pC1e_Out2), aIP-g-a
720575940613518092	160611, 54157, 4886 (I)	000841	SMP555/SMP556		162	0	pC1d_Out1 (pC1e_Out2), aIP-g-a
720575940637006195	105648, 54797, 5621 (C)	001461	SMP555/SMP556		20	0	pC1d_Out1 (pC1e_Out2), aIP-g-a
720575940621032586	102736, 64602, 5441 (C)	001458	SMP555/SMP556		15	0	pC1d_Out1 (pC1e_Out2), aIP-g-a
720575940618583206	103875, 54415, 5618 (C)	002914	SMP555/SMP556		7	0	pC1d_Out1, aIP-g-a
720575940628135675	160482, 56856, 5290 (I)	000845	aIPg4 (5813068484)/SMP558	300	115	6	pC1d_Out2 (pC1e_Out5), aIP-g-c
720575940635648602	159565, 54293, 5261 (I)	000844	aIPg4 (5813068484)/SMP558		74	0	pC1d_Out2 (pC1e_Out5), aIP-g-c
720575940633353327	155428, 55402, 5395 (I)	000843	aIPg4 (5813068484)/SMP558		65	15	pC1d_Out2 (pC1e_Out5), aIP-g-c
720575940617900123	161539, 55759, 5277 (I)	001333	aIPg4 (5813068484)/SMP558		16	0	pC1d_Out2 (pC1e_Out5), aIP-g-c
720575940614081909	106926, 60164, 5715 (C)	002795	aIPg4 (5813068484)/SMP558		15	0	pC1d_Out2, aIP-g-c
720575940619859532	160141, 55383, 5242 (I)	001329	aIPg4 (5813068484)/SMP558		8	0	pC1d_Out2 (pC1e_Out5), aIP-g-c
720575940637282675	103272, 62992, 5401 (C)	002809	aIPg4 (5813068484)/SMP558		7	0	pC1d_Out2, aIP-g-c
720575940623772734	156131, 54718, 5430 (I)	000840	aIPg1-3	232	68	45	pC1d_Out3 (also pC1d_In6, pC1e_In4, pC1e_Out3), aIP-g-b
720575940652417697	156981, 56398, 5326 (I)	000846	aIPg1-3		48	29	pC1d_Out3 (also pC1d_In6, pC1e_In4, pC1e_Out3), aIP-g-b
720575940610867683	158159, 54763, 5352 (I)	001325	aIPg1-3		32	0	pC1d_Out3 (pC1e_Out3), aIP-g-b
720575940623675578	156005, 55885, 5425 (I)	000853	aIPg1-3		21	14	pC1d_Out3 (also pC1d_In6, pC1e_Out3), aIP-g-b
720575940626519811	162407, 55670, 5367 (I)	001372	aIPg1-3		19	0	pC1d_Out3 (pC1e_Out3), aIP-g-b
720575940618177371	156581, 55421, 5425 (I)	001338	aIPg1-3		13	0	pC1d_Out3 (pC1e_Out3), aIP-g-b
720575940642845294	105088, 66835, 5461 (C)	001512	aIPg1-3		11	0	pC1d_Out3, aIP-g-b
720575940637281395	106583, 65465, 5576 (C)	002807	aIPg1-3		8	0	pC1d_Out3 (pC1e_Out3), aIP-g-b
720575940628671173	160352, 53946, 5348 (I)	001323	aIPg1-3		6	0	pC1d_Out3, aIP-g-b
720575940636747854	158657, 53413, 5382 (I)	001368	aIPg1-3		6	0	pC1d_Out3, aIP-g-b
720575940617943572	152591, 47559, 723 (I)	000236	DNa01/VES008?	177	136	0	pC1d_Out4
720575940625423381	157902, 46708, 897 (I)	002917	DNa01/VES008?		21	0	pC1d_Out4
720575940622376940	159724, 41966, 936 (I)	000234	DNa01/VES008?		20	0	pC1d_Out4
720575940632973048	162968, 56170, 5198 (I)	000847	?	137	78	0	pC1d_Out5 (pC1e_Out10)
720575940633337455	101988, 56290, 5599 (C)	000848	?		35	0	pC1d_Out5 (pC1e_Out10)
720575940633402991	156950, 45337, 4825 (I)	002504	?		24	0	pC1d_Out5
720575940625786600	160360, 54084, 1068 (I)	001459	PVLP047	135	50	0	pC1d_Out6
720575940627187326	160144, 53264, 1045 (I)	001509	PVLP047		36	0	pC1d_Out6
720575940631109858	158670, 54288, 1178 (I)	001510	PVLP047		34	9	pC1d_Out6
720575940613480134	159506, 53115, 1281 (I)	000824	PVLP047		15	21	pC1d_Out6
720575940621514679	153445, 35729, 920 (I)	002503	SIP024	121	31	0	pC1d_Out7 (pC1e_Out1)
720575940624088984	105682, 34330, 1714 (C)	001443	SIP024		25	0	pC1d_Out7
720575940607494468	114750, 26059, 1643 (C)	002785	SIP024		23	0	pC1d_Out7 (pC1e_Out1)
720575940611674408	152296, 29682, 1395 (I)	002428	SIP024		20	0	pC1d_Out7 (pC1e_Out1)
720575940628295286	153401, 41349, 731 (I)	001501	SIP024		16	0	pC1d_Out7 (pC1e_Out1)
720575940623872284	153780, 39489, 790 (I)	001508	SIP024		6	0	pC1d_Out7
720575940603274272	159786, 49012, 711 (I)	000851	LAL003	118	36	0	pC1d_Out8 (pC1e_Out4)
720575940615712069	107417, 45558, 1190 (C)	001442	LAL003		32	0	pC1d_Out8 (pC1e_Out4)
720575940620715107	157581, 49059, 622 (I)	001446	LAL003		30	0	pC1d_Out8 (pC1e_Out4)
720575940619495262	104086, 45146, 1369 (I)	001444	LAL003		20	0	pC1d_Out8 (pC1e_Out4)
720575940617984347	165654, 60775, 799 (I)	000829	possibly AVLP181/AVLP182/AVLP183	106	38	0	pC1d_Out9
720575940619487326	175536, 51940, 1555 (I)	000983	possibly AVLP181/AVLP182/AVLP183		27	0	pC1d_Out9
720575940626651395	168187, 58107, 773 (I)	001432	possibly AVLP181/AVLP182/AVLP183		24	0	pC1d_Out9
720575940609996773	93846, 53976, 1851 (C)	001487	possibly AVLP181/AVLP182/AVLP183		10	0	pC1d_Out9
720575940620424472	172029, 59412, 1019 (I)	001695	possibly AVLP181/AVLP182/AVLP183 (?)		7	0	pC1d_Out9
720575940621652477	157445, 52015, 5338 (I)	000806	CL278 (pIP5 candidate)	98	48	0	pC1d_Out10, pC2-like/pIP5
720575940620470541	165460, 47788, 4847 (I)	000805	CL278 (pIP5 candidate)		34	0	pC1d_Out10, pC2-like/pIP5
720575940611317741	165144, 48202, 4892 (I)	001831	CL278 (pIP5 candidate)		8	0	pC1d_Out10, pC2-like/pIP5
720575940612348778	98537, 45026, 5434 (C)	001641	CL278 (pIP5 candidate)		8	0	pC1d_Out10, pC2-like/pIP5
720575940627344506	148781, 47112, 5045 (I)	000852		62	55	0	pMN1 (DNp13) (pC1e_Out7)
720575940621525501	115343, 46115, 5315 (C)	002582			7	0	pMN1 (DNp13) (pC1e_Out7)
720575940619676284	153806, 37977, 966 (I)	001499		58	20	0	(pC1e_Out8)
720575940627500844	154690, 39682, 878 (I)	001498			22	0	(pC1e_Out8)
720575940620676963	153822, 40314, 818 (I)	002786			7	0	(pC1e_Out8)
720575940626023153	152144, 37232, 887 (I)	002916			9	0	(pC1e_Out8)
720575940625770481	129953, 34831, 1083 (Middle)	001455		58	23	0
720575940622553933	131190, 34447, 875 (Middle)	001449			11	0
720575940620673048	128980, 36023, 968 (Middle)	002915			12	0
720575940630693421	130443, 34526, 1284 (Middle)	002913			12	0
720575940627929820	169855, 55243, 932 (I)	001450		56	34	0
720575940625637372	84537, 53440, 2545 (C)	001460			22	0
720575940623313866	124860, 46080, 5025 (C)	000162	pC1d (C)	44	20	16	(pC1d_In5)
720575940620639256	142741, 44980, 4908 (I)	000175	pC1e (I)		11	16	(pC1d_In5)
720575940633769335	145823, 42810, 5061 (I)	000182	pC1c (I)		13	38	(pC1d_In5)
720575940609937650	157406, 50363, 5004 (I)	000849		40	40	0
720575940626375503	154915, 79846, 1671 (I)	001507		36	36	0
720575940624257369	85440, 42768, 3299 (C)	001445		27	27	0
720575940620266957	156849, 80961, 2224 (I)	000827		26	26	137	(pC1d_In2)
720575940621383175	162425, 41349, 4828 (I)	000850		21	21	0
720575940620066124	157656, 44423, 4827 (I)	002429		19	19	0
720575940625859914	150927, 76150, 1279 (I)	002424		15	15	6

## Sheet: pC1e_In_byType
FlyWire segment ID (version used in Deutsch et al. 2020)	Soma coordinates (*) (I/C - ipsi/contralateral to pC1e)	Flywire Neuron Database ID	hemibrain 1.1 type with shared morphology	Total presynaptic to pC1e (synapses)	presynaptic to pC1e	postynaptic to pC1e	Deutsch et al. 2020
720575940602076896	169652, 62282, 988 (I)	001434	possibly AVLP297	57	25	0	pC1e_In1
720575940617297713	173430, 60206, 1195 (I)	000823	possibly AVLP297		22	0	pC1e_In1
720575940628126039	173599, 62572, 1226 (I)	002783	possibly AVLP297		10	0	pC1e_In1
720575940612265890	183445, 37705, 2966 (I)	001169	AVLP008	54	27	0	pC1e_In2
720575940628928843	182277, 40565, 3302 (I)	000283	AVLP008		14	0	pC1e_In2
720575940627295426	180556, 40816, 2954 (I)	001185	AVLP008		13	0	pC1e_In2
720575940623548720	143814, 75125, 1054 (I)	002777	PS088?	45	24	0	pC1e_In3
720575940634235749	120218, 70844, 1352 (C)	002283	PS088?		21	0	pC1e_In3
720575940623772734	155965, 54501, 5432 (I)	000840	aIPg1-3	33	19	22	pC1e_In4 (also pC1d_In6, pC1d_Out3, pC1e_Out3)
720575940652417697	156992, 56149, 5331 (I)	000846	aIPg1-3		14	9	pC1e_In4 (also pC1d_In6, pC1d_Out3, pC1e_Out3)
720575940622516557	181562, 36628, 2860 (I)	000949	CL003	32	32	0	pC1e_In5
720575940624136450	160250, 26217, 4049 (I)	002779	CL198_b	31	16	0	pC1e_In6
720575940621459381	150908, 23278, 3624 (I)	002784	CL198_b		9	0	pC1e_In6
720575940615530786	142569, 23776, 3485 (I)	002939	Possibly CL198_b		6	0	pC1e_In6
720575940617307953	146687, 43948, 5037 (I)	000183	pC1a	31	24	0	pC1e_In7
720575940629334841	120614, 48631, 5378 (C)	000801	pC1a		7	0	pC1e_In7 (pC1d_In5)
720575940608571256	130675, 35782, 880 (Middle)	001431	SMP085	30	30	0	pC1e_In8
720575940612499306	182606, 40349, 3227 (I)	002776	?	30	30	0	pC1e_In9
720575940620667235	156821, 81561, 2135 (I)	002778		28	21	0	pC1e_In10
720575940635669225	106621, 79045, 2851 (C)	002282			7	0	pC1e_In10
720575940623531301	119102, 99619, 6708 (Soma outside data set)	000816		24	24	0	pC1e_In11
720575940642747159	151804, 80807, 2052 (I)	001500		24	24	0	pC1e_In12
720575940637228789	142347, 38719, 4766 (I)	002935		21	21	0	pC1e_In13
720575940629686632	103539, 48318, 5272 (C)	001533	pC2l candidate	21	15	0	pC1e_In14
720575940607232836	164304, 49518, 4756 (I)	000190	pC2l candidate		6	0	pC1e_In14
720575940622547021	141999, 60942, 2099 (no Soma)	001438		20	20	0	pC1e_In15
720575940629956655	160185, 73052, 1182 (I)	001433		19	19	0	pC1e_In16
720575940610012645	166161, 53320, 4940 (I)	002044		18	18	0	pC1e_In17
720575940626331435	101209, 48954, 5209 (C)	001390		17	17	0	pC1e_In20 (pC1d_In8)
720575940624280728	182746, 39975, 2796 (I)	001187		14	8	0	pC1e_In21
720575940607486532	181560, 40397, 2898 (I)	001182			6	0	pC1e_In21

## Sheet: pC1e_Out_byType
FlyWire segment ID (version used in Deutsch et al. 2020)	Soma coordinates (*) (I/C - ipsi/contralateral to pC1e)	Flywire Neuron Database ID	hemibrain 1.1 type with shared morphology	Total presynaptic to pC1e (synapses)	postsynaptic to pC1e	presynaptic to pC1e	Deutsch et al. 2020
720575940621514679	153411, 35529, 924 (I)	002503	SIP024	126	51	0	pC1e_Out1 (pC1d_Out7)
720575940611674408	152079, 29858, 1354 (I)	002428	SIP024		39	0	pC1e_Out1 (pC1d_Out7)
720575940628295286	153401, 41349, 731 (I)	001501	SIP024		26	0	pC1e_Out1 (pC1d_Out7)
720575940607494468	114750, 26059, 1643 (C)	002785	SIP024		10	0	pC1e_Out1 (pC1d_Out7)
720575940626345577	159543, 54432, 5067 (I)	000842	SMP555/SMP556	103	34	0	pC1e_Out2 (pC1d_Out1)
720575940626953063	157284, 53582, 5031 (I)	000839	SMP555/SMP556		25	0	pC1e_Out2 (pC1d_Out1)
720575940613518092	160551, 54151, 4888 (I)	000841	SMP555/SMP556		22	0	pC1e_Out2 (pC1d_Out1)
720575940637006195	105674, 54906, 5621 (C)	001461	SMP555/SMP556		14	0	pC1e_Out2 (pC1d_Out1)
720575940621032586	102736, 64602, 5441 (C)	001458	SMP555/SMP556		8	0	pC1e_Out2 (pC1d_Out1)
720575940618177371	156581, 55421, 5425 (I)	001338	aIPg1-3	96	26	0	pC1e_Out3 (pC1d_Out3)
720575940626519811	162459, 55554, 5367 (I)	001372	aIPg1-3		21	0	pC1e_Out3 (pC1d_Out3)
720575940623772734	155965, 54501, 5432 (I)	000840	aIPg1-3		22	19	pC1e_Out3 (also pC1d_In6, pC1d_Out3, pC1e_In4)
720575940652417697	156992, 56149, 5331 (I)	000846	aIPg1-3		9	14	pC1e_Out3 (also pC1d_In6, pC1d_Out3, pC1e_In4)
720575940623675578	155888, 55974, 5428 (I)	000853	aIPg1-3		6	0	pC1e_Out3 (also pC1d_In6, pC1d_Out3)
720575940637281395	106583, 65465, 5576 (C)	002807	aIPg1-3		6	0	pC1e_Out3 (pC1d_Out3)
720575940610867683	158076, 54625, 5361 (I)	001325	aIPg1-3		6	0	pC1e_Out3 (pC1d_Out3)
720575940620715107	157581, 49059, 622 (I)	001446	LAL003	74	24	0	pC1e_Out4 (pC1d_Out8)
720575940619495262	104028, 45152, 1376 (C)	001444	LAL003		22	0	pC1e_Out4 (pC1d_Out8)
720575940615712069	107367, 45623, 1186 (C)	001442	LAL003		17	0	pC1e_Out4 (pC1d_Out8)
720575940603274272	159818, 48559, 725 (I)	000851	LAL003		11	0	pC1e_Out4 (pC1d_Out8)
720575940635648602	159498, 54025, 5268 (I)	000844	aIPg4 (5813068484)/SMP558	66	14	0	pC1e_Out5 (pC1d_Out2), aIP-g-c
720575940628135675	160399, 56856, 5289 (I)	000845	aIPg4 (5813068484)/SMP558		14	0	pC1e_Out5 (pC1d_Out2), aIP-g-c
720575940633353327	155455, 55364, 5395 (I)	000843	aIPg4 (5813068484)/SMP558		11	0	pC1e_Out5 (pC1d_Out2), aIP-g-c
720575940617574229	105972, 58003, 5524 (C)	002788	aIPg4 (5813068484)/SMP558		7	0	pC1e_Out5, aIP-g-c
720575940617900123	161598, 55716, 5275 (I)	001333	aIPg4 (5813068484)/SMP558		8	0	pC1e_Out5 (pC1d_Out2), aIP-g-c
720575940624211075	159751, 54324, 4929 (I)	001320	aIPg4 (5813068484)/SMP558		6	0	pC1e_Out5, aIP-g-c
720575940619859532	160141, 55383, 5242 (I)	001329	aIPg4 (5813068484)/SMP558		6	0	pC1e_Out5 (pC1d_Out2), aIP-g-c
720575940644164387	136852, 29461, 1025 (I)	002780	?	63	63	0	pC1e_Out6
720575940627344506	148807, 47256, 5032 (I)	000852	CL342	61	49	0	pC1e_Out7, (pMN1 (DNp13))
720575940621525501	115343, 46115, 5315 (C)	002582	CL342		12	0	pC1e_Out7, (pMN1 (DNp13))
720575940627500844	154690, 39682, 878 (I)	001498	LAL028	49	23	0	pC1e_Out8
720575940619676284	153798, 37768, 961 (I)	001499	LAL028		13	0	pC1e_Out8
720575940620676963	153822, 40314, 818 (I)	002786	LAL028		7	0	pC1e_Out8
720575940626023153	152119, 37242, 887 (I)	002916	LAL028		6	0	pC1e_Out8
720575940614961245	159544, 47321, 770 (I)	002781	?	43	43	0	pC1e_Out9
720575940633337455	101943, 56089, 5598 (C)	000848	?	34	19	0	pC1e_Out10 (pC1d_Out5)
720575940632973048	162918, 56357, 5186 (I)	000847	?		15	0	pC1e_Out10 (pC1d_Out5)
720575940605005234	161401, 47180, 4863 (I)	002782	LAL006 or CL037 or VES060/VES061/VES062	27	27	0	pC1e_Out11
720575940621566205	179207, 41780, 2933 (I)	000720	AVLP016	24	24	0	pC1e_Out12
720575940602652844	105074, 28846, 2087 (C)	000814	possibly CL037	17	17	0	pC1e_Out13
720575940618771952	145817, 41367, 5139 (I)	000179	pC1d	16	16	0	pC1e_Out14

## Sheet: All_PublicCells
hemibrain 1.1 type with shared morphology	Segment ID (Sep 25, 2020)	Public link group	Public links
pC1a	720575940617307953	pC1	https://flywire.ai/#links/Deutsch2020a/pC1
pC1b	720575940633531503	pC1
pC1c	720575940633769335	pC1
pC1d	720575940618771952	pC1
pC1e	720575940620639256	pC1
pC1a	720575940629334841	pC1
pC1b	720575940612211198	pC1
pC1c	720575940614245947	pC1
pc1d	720575940623313866	pC1
pC1e	720575940624753466	pC1
aIP-g-a left	720575940626345577	aIPg	https://flywire.ai/#links/Deutsch2020a/aIPg
aIP-g-a left	720575940613518092	aIPg
aIP-g-a left	720575940620077526	aIPg
aIP-g-a left	720575940629779015	aIPg
aIP-g-a left	720575940626953063	aIPg
aIP-g-a left	720575940612912287	aIPg
aIP-g-b left	720575940636747854	aIPg
aIP-g-b left	720575940609970090	aIPg
aIP-g-b left	720575940626321707	aIPg
aIP-g-b left	720575940637165987	aIPg
aIP-g-b left	720575940632598111	aIPg
aIP-g-b left	720575940609533845	aIPg
aIP-g-b left	720575940617904475	aIPg
aIP-g-b left	720575940629196856	aIPg
aIP-g-b left	720575940615200441	aIPg
aIP-g-b left	720575940617591687	aIPg
aIP-g-b left	720575940649858038	aIPg
aIP-g-b left	720575940609915365	aIPg
aIP-g-b left	720575940620431752	aIPg
aIP-g-b left	720575940628671173	aIPg
aIP-g-b left	720575940619540506	aIPg
aIP-g-b left	720575940618376614	aIPg
aIP-g-b left	720575940618177371	aIPg
aIP-g-b left	720575940610867683	aIPg
aIP-g-b left	720575940652417697	aIPg
aIP-g-b left	720575940626519811	aIPg
aIP-g-b left	720575940623675578	aIPg
aIP-g-b left	720575940623772734	aIPg
aIP-g-b left	720575940634109326	aIPg
aIP-g-b left	720575940610560022	aIPg
aIP-g-c left	720575940623766458	aIPg
aIP-g-c left	720575940624211075	aIPg
aIP-g-c left	720575940628698898	aIPg
aIP-g-c left	720575940635648602	aIPg
aIP-g-c left	720575940629957201	aIPg
aIP-g-c left	720575940617900123	aIPg
aIP-g-c left	720575940628135675	aIPg
aIP-g-c left	720575940633353327	aIPg
AVLP096	720575940636741685	pC1d_TopInputs	https://flywire.ai/#links/Deutsch2020a/pC1d_TopInputs
AVLP096	720575940612153746	pC1d_TopInputs
AVLP096	720575940623368906	pC1d_TopInputs
AVLP096	720575940637168035	pC1d_TopInputs
AVLP096	720575940629335097	pC1d_TopInputs
AVLP096	720575940629657192	pC1d_TopInputs
AVLP096	720575940630436141	pC1d_TopInputs
AVLP096	720575940614239547	pC1d_TopInputs
AOTU064	720575940620266957	pC1d_TopInputs
AOTU064	720575940638698997	pC1d_TopInputs
CL278 (pIP5 candidate)	720575940621618429	pC1d_TopInputs
CL278 (pIP5 candidate)	720575940611528243	pC1d_TopInputs
CL278 (pIP5 candidate)	720575940618286831	pC1d_TopInputs
CL278 (pIP5 candidate)	720575940617661831	pC1d_TopInputs
WED014	720575940614669707	pC1d_TopInputs
WED014	720575940630492845	pC1d_TopInputs
WED014	720575940615137681	pC1d_TopInputs
pC1c	720575940633769335	pC1d_TopInputs
pC1a	720575940629334841	pC1d_TopInputs
pC1e	720575940620639256	pC1d_TopInputs
pC1d	720575940623313866	pC1d_TopInputs
pC1e	720575940624753466	pC1d_TopInputs
aIPg1-3	720575940623772734	pC1d_TopInputs
aIPg1-3	720575940652417697	pC1d_TopInputs
aIPg1-3	720575940623675578	pC1d_TopInputs
AOTU008_a/AOTU008_b	720575940631263457	pC1d_TopInputs
AOTU008_a/AOTU008_b	720575940622365991	pC1d_TopInputs
AOTU008_a/AOTU008_b	720575940641738440	pC1d_TopInputs
AOTU008_a/AOTU008_b	720575940630692141	pC1d_TopInputs
AOTU008_a/AOTU008_b	720575940641653408	pC1d_TopInputs
AOTU008_a/AOTU008_b	720575940620668696	pC1d_TopInputs
AOTU008_a/AOTU008_b	720575940617369649	pC1d_TopInputs
PVLP130	720575940626331435	pC1d_TopInputs
AVLP029	720575940624030236	pC1d_TopInputs
SMP555/SMP556	720575940626953063	pC1d_TopOutputs	https://flywire.ai/#links/Deutsch2020a/pC1d_TopOutputs
SMP555/SMP556	720575940626345577	pC1d_TopOutputs
SMP555/SMP556	720575940613518092	pC1d_TopOutputs
SMP555/SMP556	720575940637006195	pC1d_TopOutputs
SMP555/SMP556	720575940621032586	pC1d_TopOutputs
SMP555/SMP556	720575940618583206	pC1d_TopOutputs
aIPg4	720575940628135675	pC1d_TopOutputs
aIPg4	720575940635648602	pC1d_TopOutputs
aIPg4	720575940633353327	pC1d_TopOutputs
aIPg4	720575940617900123	pC1d_TopOutputs
aIPg4	720575940614081909	pC1d_TopOutputs
aIPg4	720575940619859532	pC1d_TopOutputs
aIPg4	720575940637282675	pC1d_TopOutputs
aIPg1-3	720575940623772734	pC1d_TopOutputs
aIPg1-3	720575940652417697	pC1d_TopOutputs
aIPg1-3	720575940610867683	pC1d_TopOutputs
aIPg1-3	720575940623675578	pC1d_TopOutputs
aIPg1-3	720575940626519811	pC1d_TopOutputs
aIPg1-3	720575940618177371	pC1d_TopOutputs
aIPg1-3	720575940642845294	pC1d_TopOutputs
aIPg1-3	720575940637281395	pC1d_TopOutputs
aIPg1-3	720575940628671173	pC1d_TopOutputs
aIPg1-3	720575940636747854	pC1d_TopOutputs
SIP024	720575940621514679	pC1d_TopOutputs
SIP024	720575940624088984	pC1d_TopOutputs
SIP024	720575940607494468	pC1d_TopOutputs
SIP024	720575940611674408	pC1d_TopOutputs
SIP024	720575940628295286	pC1d_TopOutputs
SIP024	720575940623872284	pC1d_TopOutputs
LAL028	720575940619676284	pC1d_TopOutputs
LAL028	720575940627500844	pC1d_TopOutputs
LAL028	720575940620676963	pC1d_TopOutputs
LAL028	720575940626023153	pC1d_TopOutputs
DNa01/VES008?	720575940617943572	pC1d_TopOutputs
DNa01/VES008?	720575940625423381	pC1d_TopOutputs
DNa01/VES008?	720575940622376940	pC1d_TopOutputs
PVLP047	720575940625786600	pC1d_TopOutputs
PVLP047	720575940627187326	pC1d_TopOutputs
PVLP047	720575940631109858	pC1d_TopOutputs
PVLP047	720575940613480134	pC1d_TopOutputs
?	720575940632973048	pC1d_TopOutputs
?	720575940633337455	pC1d_TopOutputs
?	720575940633402991	pC1d_TopOutputs
LAL003	720575940603274272	pC1d_TopOutputs
LAL003	720575940615712069	pC1d_TopOutputs
LAL003	720575940620715107	pC1d_TopOutputs
LAL003	720575940619495262	pC1d_TopOutputs
possibly AVLP181/AVLP182/AVLP183	720575940617984347	pC1d_TopOutputs
possibly AVLP181/AVLP182/AVLP183	720575940619487326	pC1d_TopOutputs
possibly AVLP181/AVLP182/AVLP183	720575940626651395	pC1d_TopOutputs
possibly AVLP181/AVLP182/AVLP183	720575940609996773	pC1d_TopOutputs
possibly AVLP181/AVLP182/AVLP183 (?)	720575940620424472	pC1d_TopOutputs
CL278 (pIP5 candidate)	720575940621652477	pC1d_TopOutputs
CL278 (pIP5 candidate)	720575940620470541	pC1d_TopOutputs
CL278 (pIP5 candidate)	720575940611317741	pC1d_TopOutputs
CL278 (pIP5 candidate)	720575940612348778	pC1d_TopOutputs
possibly AVLP297	720575940602076896	pC1e_TopInputs	https://flywire.ai/#links/Deutsch2020a/pC1e_TopInputs
possibly AVLP297	720575940617297713	pC1e_TopInputs
possibly AVLP297	720575940628126039	pC1e_TopInputs
AVLP008	720575940612265890	pC1e_TopInputs
AVLP008	720575940628928843	pC1e_TopInputs
AVLP008	720575940627295426	pC1e_TopInputs
PS088?	720575940623548720	pC1e_TopInputs
PS088?	720575940634235749	pC1e_TopInputs
aIPg1-3	720575940623772734	pC1e_TopInputs
aIPg1-3	720575940652417697	pC1e_TopInputs
CL003	720575940622516557	pC1e_TopInputs
CL198_b	720575940624136450	pC1e_TopInputs
CL198_b	720575940621459381	pC1e_TopInputs
Possibly CL198_b	720575940615530786	pC1e_TopInputs
pC1a	720575940617307953	pC1e_TopInputs
pC1a	720575940629334841	pC1e_TopInputs
SMP085	720575940608571256	pC1e_TopInputs
?	720575940612499306	pC1e_TopInputs
SIP024	720575940621514679	pC1e_TopOutputs	https://flywire.ai/#links/Deutsch2020a/pC1e_TopOutputs
SIP024	720575940611674408	pC1e_TopOutputs
SIP024	720575940628295286	pC1e_TopOutputs
SIP024	720575940607494468	pC1e_TopOutputs
SMP555/SMP556	720575940626345577	pC1e_TopOutputs
SMP555/SMP556	720575940626953063	pC1e_TopOutputs
SMP555/SMP556	720575940613518092	pC1e_TopOutputs
SMP555/SMP556	720575940637006195	pC1e_TopOutputs
SMP555/SMP556	720575940621032586	pC1e_TopOutputs
aIPg1-3	720575940618177371	pC1e_TopOutputs
aIPg1-3	720575940626519811	pC1e_TopOutputs
aIPg1-3	720575940623772734	pC1e_TopOutputs
aIPg1-3	720575940652417697	pC1e_TopOutputs
aIPg1-3	720575940623675578	pC1e_TopOutputs
aIPg1-3	720575940637281395	pC1e_TopOutputs
aIPg1-3	720575940610867683	pC1e_TopOutputs
LAL003	720575940620715107	pC1e_TopOutputs
LAL003	720575940619495262	pC1e_TopOutputs
LAL003	720575940615712069	pC1e_TopOutputs
LAL003	720575940603274272	pC1e_TopOutputs
aIPg4 (5813068484)/SMP558	720575940635648602	pC1e_TopOutputs
aIPg4 (5813068484)/SMP558	720575940628135675	pC1e_TopOutputs
aIPg4 (5813068484)/SMP558	720575940633353327	pC1e_TopOutputs
aIPg4 (5813068484)/SMP558	720575940617574229	pC1e_TopOutputs
aIPg4 (5813068484)/SMP558	720575940617900123	pC1e_TopOutputs
aIPg4 (5813068484)/SMP558	720575940624211075	pC1e_TopOutputs
aIPg4 (5813068484)/SMP558	720575940619859532	pC1e_TopOutputs
?	720575940644164387	pC1e_TopOutputs
CL342	720575940627344506	pC1e_TopOutputs
CL342	720575940621525501	pC1e_TopOutputs
LAL028	720575940627500844	pC1e_TopOutputs
LAL028	720575940619676284	pC1e_TopOutputs
LAL028	720575940620676963	pC1e_TopOutputs
LAL028	720575940626023153	pC1e_TopOutputs
?	720575940614961245	pC1e_TopOutputs
?	720575940633337455	pC1e_TopOutputs
?	720575940632973048	pC1e_TopOutputs
